# Supplementary material
Source: PubMed Central journal article supplement (PMC5108183)
Supplement: CJN.00720116SupplementaryData1.pdf [file CJN.00720116SupplementaryData1.pdf]

## Authors and Affiliations

Kyla L. Naylor,<sup>1,2</sup> Jerilynn Prior,<sup>3</sup> Amit X. Garg,<sup>1,4,5</sup> Claudie Berger,<sup>6</sup> Lisa Langsetmo,<sup>7</sup> Jonathan D. Adachi,<sup>8</sup> David Goltzman,<sup>9</sup> Christopher S. Kovacs,<sup>10</sup> Robert G. Josse,<sup>11</sup> William D. Leslie,<sup>12</sup>

1. Institute for Clinical Evaluative Sciences (ICES), Ontario, Canada
2. Institute of Health Policy, Management, and Evaluation, University of Toronto, Toronto, Ontario, Canada
3. Department of Medicine/Endocrinology and Metabolism, University of British Columbia, Vancouver, Canada
4. Department of Epidemiology and Biostatistics, Western University, London, Ontario, Canada
5. Division of Nephrology, Western University, London, Ontario, Canada
6. CaMos National Coordinating Centre, McGill University, Montreal, Quebec, Canada
7. Division of Epidemiology and Community Health, University of Minnesota, Minneapolis, MN, United States
8. Division of Rheumatology, McMaster University, Hamilton, Ontario, Canada
9. Department of Medicine, McGill University, Montreal, Quebec, Canada
10. Discipline of Medicine (Endocrinology and Metabolism) at Memorial University, St. John's, Newfoundland, Canada
11. Division of Endocrinology and Metabolism, University of Toronto, Toronto, Ontario, Canada
12. Department of Medicine, University of Manitoba, Winnipeg, Manitoba, Canada
